# Supplementary material for: Quantifying the impacts of non-carbonic acid (NCA) stress on dissolved inorganic carbon (DIC) generation in the granitic-hosted watershed, Huangshan UNESCO Global Geopark, China
Source: Royal Society of Chemistry journal article supplement (doi:10.1039/d2em00071g), 2022-01-01
Supplement: d2em00071g2.pdf [file d2em00071g2.pdf]

Supplementary Table 1. Sampling locations, water parameters, chemical compositions and  $\delta^{13}\text{C}_{\text{DIC}}$  of the NHMW

| Season | Sample | Tw   | pH   | EC                        | K <sup>+</sup>    | Na <sup>+</sup>   | Ca <sup>2+</sup>  | Mg <sup>2+</sup>  | Cl <sup>-</sup>   | NO <sub>3</sub> <sup>-</sup> | SO <sub>4</sub> <sup>2-</sup> | HCO <sub>3</sub> <sup>-</sup> | Si                | NICB | DOC                   | TDS                   | $\delta^{13}\text{C}$ |
|--------|--------|------|------|---------------------------|-------------------|-------------------|-------------------|-------------------|-------------------|------------------------------|-------------------------------|-------------------------------|-------------------|------|-----------------------|-----------------------|-----------------------|
|        | □NO.   | (°C) | □    | ( $\mu\text{s cm}^{-1}$ ) | ( $\mu\text{M}$ )            | ( $\mu\text{M}$ )             | ( $\mu\text{M}$ )             | ( $\mu\text{M}$ ) | (%)  | (mg L <sup>-1</sup> ) | (mg L <sup>-1</sup> ) | ‰PDB                  |
| Dry    | M1     | 8    | 6.95 | 90                        | 42                | 100               | 286               | 98                | 68                | 117                          | 77                            | 950                           | 108               | -42  | 4.9                   | 96                    | -9.354                |
|        | M2     | 7.9  | 7.95 | 50                        | 31                | 41                | 195               | 87                | 52                | 139                          | 71                            | 300                           | 36                | 1    | 3.6                   | 49                    | -5.256                |
|        | M3     | 9.1  | 7.24 | 170                       | 56                | 131               | 342               | 92                | 78                | 77                           | 93                            | 850                           | 171               | -13  | 6.4                   | 94                    | -8.978                |
|        | M4     | 7.8  | 7.43 | 120                       | 38                | 93                | 402               | 86                | 81                | 113                          | 113                           | 1100                          | 136               | -37  | 5.1                   | 113                   | -9.493                |
|        | M5     | 8.3  | 7.35 | 110                       | 31                | 53                | 414               | 76                | 22                | 120                          | 84                            | 975                           | 126               | -21  | 6.1                   | 100                   | -                     |
|        | M6     | 8.4  | 7.48 | 120                       | 46                | 97                | 426               | 91                | 61                | 95                           | 106                           | 1050                          | 143               | -20  | 4.6                   | 110                   | -9.312                |
|        | M7     | 8.6  | 6.55 | 70                        | 38                | 103               | 202               | 79                | 14                | 85                           | 59                            | 525                           | 200               | -6   | 4.5                   | 63                    | -7.259                |
|        | P1     | 8.8  | 7.5  | 110                       | 88                | 288               | 173               | 91                | 124               | 322                          | 77                            | 310                           | 272               | -1   | 5.2                   | 77                    | -5.729                |
|        | P2     | 8.5  | 7.55 | 120                       | 90                | 297               | 186               | 87                | 142               | 279                          | 72                            | 275                           | 277               | 10   | 5.4                   | 74                    | -4.173                |
|        | P3     | 8.8  | 8.74 | 60                        | 50                | 158               | 104               | 47                | 45                | 86                           | 52                            | 325                           | 237               | -10  | 4.2                   | 49                    | -8.217                |
|        | P4     | 8.7  | 7.31 | 60                        | 29                | 211               | 95                | 44                | 111               | -                            | 45                            | 275                           | 244               | -    | 3.7                   | -                     | -7.515                |
|        | P5     | 7.6  | 7.4  | 40                        | 28                | 96                | 89                | 31                | 25                | 148                          | 32                            | 150                           | 195               | -7   | 3.0                   | 35                    | -7.440                |
|        | P6     | 7.6  | 6.97 | 40                        | 29                | 110               | 80                | 30                | 21                | 91                           | 27                            | 225                           | 254               | -9   | 3.2                   | 37                    | -                     |
|        | P7     | 6.9  | 7    | 40                        | 27                | 61                | 88                | 30                | 31                | 152                          | 47                            | 100                           | 134               | -17  | 2.6                   | 32                    | -2.127                |
|        | P8     | 3.1  | 6.08 | 10                        | 15                | 20                | 59                | 18                | 12                | 96                           | 38                            | 25                            | 83                | -10  | 2.3                   | 18                    | -                     |
|        | P9     | 4.7  | 6.2  | 30                        | 28                | 88                | 152               | 13                | 53                | 163                          | 47                            | 80                            | 98                | 13   | 2.9                   | 34                    | -4.712                |
|        | R1     | 8.4  | 7.82 | 70                        | 29                | 88                | 164               | 84                | 72                | 107                          | 66                            | 350                           | 147               | -8   | 3.9                   | 53                    | -5.536                |
|        | R2     | 7.9  | 7.5  | 50                        | 24                | 76                | 118               | 85                | 70                | 132                          | 72                            | 200                           | 115               | -8   | 3.1                   | 42                    | -6.712                |
| R3     | 7.4    | 7.74 | 40   | 19                        | 72                | 81                | 79                | 26                | 138               | 79                           | 100                           | 150                           | -3                | 2.9  | 35                    | -9.447                |                       |
| R4     | 7.3    | 7.62 | 90   | 38                        | 98                | 266               | 81                | 53                | 102               | 67                           | 610                           | 177                           | -8                | 5.1  | 73                    | -9.171                |                       |
| R5     | 7.1    | 7.17 | 70   | 32                        | 133               | 160               | 64                | 49                | 82                | 46                           | 450                           | 225                           | -10               | 4.4  | 57                    | -7.857                |                       |
| R6     | 9.3    | 8.34 | 70   | 23                        | 95                | 184               | 79                | 30                | 100               | 47                           | 525                           | 206                           | -16               | 4.5  | 62                    | -9.230                |                       |

|     |      |      |      |     |    |     |     |     |     |     |     |     |     |     |     |    |         |
|-----|------|------|------|-----|----|-----|-----|-----|-----|-----|-----|-----|-----|-----|-----|----|---------|
|     | R7   | 6.5  | 6.84 | 30  | 20 | 62  | 76  | 28  | 35  | 159 | 45  | 50  | 128 | -15 | 2.4 | 28 | -5.370  |
|     | R8   | 6.4  | 6.6  | 30  | 29 | 73  | 81  | 25  | 21  | -   | -   | 35  | 130 | -   | 2.6 | -  | -7.073  |
|     | R9   | 6.7  | 6.7  | 30  | 18 | 38  | 75  | 35  | 21  | 87  | 48  | 100 | 122 | -11 | 2.7 | 26 | -5.692  |
|     | R10  | 9.9  | 8.66 | 60  | 24 | 108 | 148 | 82  | 30  | 73  | 53  | 435 | 203 | -9  | 3.9 | 54 | -8.794  |
|     | R11  | 8.8  | 7.68 | 50  | 22 | 89  | 119 | 69  | 68  | 103 | 40  | -   | 199 | -   | 3.8 | -  | -7.333  |
|     | S1   | 7.4  | 7.22 | 20  | 18 | 78  | 96  | 72  | 61  | 116 | 91  | 410 | 120 | -79 | 3.2 | 55 | -8.251  |
|     | S2   | 8.9  | 7.71 | 50  | 18 | 76  | 140 | 61  | 25  | 94  | 37  | 350 | 177 | -10 | 3.7 | 46 | -7.683  |
|     | S3   | 8.3  | 7.54 | 40  | 14 | 52  | 82  | 53  | 24  | 118 | 42  | 175 | 152 | -19 | 3.3 | 33 | -8.376  |
|     | TPH1 | 10   | 8.08 | 90  | 37 | 190 | 299 | 93  | 49  | 41  | 84  | 750 | 14  | 0   | 8.7 | 79 | -7.986  |
|     | TPH2 | 9.8  | 7.98 | 90  | 48 | 112 | 313 | 104 | 156 | 48  | 77  | 760 | 13  | -13 | 5.4 | 82 | -8.974  |
|     | TPH3 | 8.8  | 8.53 | 60  | 30 | 88  | 169 | 78  | 62  | 109 | 71  | 325 | 138 | -4  | 3.9 | 51 | -9.098  |
|     | MSG1 | 8.4  | 6.6  | 40  | 17 | 10  | 98  | 97  | 49  | 105 | 73  | 150 | 78  | -8  | 3.2 | 34 | -       |
|     | MSG2 | 6.3  | 6.17 | 30  | 24 | 36  | 94  | 25  | 15  | 101 | 50  | 50  | 106 | 11  | 2.8 | 24 | -       |
|     | PDG  | 27.7 | 6.6  | 60  | 39 | 182 | 128 | 28  | 6   | 24  | 21  | 625 | 352 | -31 | 4.4 | 63 | -13.430 |
|     | RSG  | 6.3  | 7.22 | 30  | 19 | 64  | 71  | 72  | 55  | 115 | 69  | 150 | 114 | -24 | 2.9 | 35 | -5.113  |
|     | SSG  | 7.8  | 6.65 | 40  | 16 | 77  | 73  | 73  | 64  | 129 | 85  | 85  | 120 | -16 | 3.0 | 34 | -4.634  |
| Wet | M1   | 26.9 | 8.32 | 70  | 40 | 125 | 164 | 98  | 61  | 217 | 27  | 413 | 380 | -8  | 3.1 | 67 | -       |
|     | M2   | 29.5 | 7.99 | 130 | 59 | 73  | 315 | 108 | 76  | 36  | 33  | 113 | 233 | 70  | 6.2 | 41 | -11.937 |
|     | M3   | 28   | 7.08 | 120 | 59 | 91  | 325 | 95  | 55  | 40  | 53  | 555 | 137 | 24  | 5.0 | 67 | -12.377 |
|     | M4   | 25.3 | 7.8  | 110 | 42 | 58  | 360 | 87  | 36  | 39  | 94  | 458 | 226 | 28  | 5.2 | 66 | -11.737 |
|     | M5   | 22.3 | 6.99 | 60  | 35 | 74  | 170 | 48  | 19  | 38  | 108 | 210 | 156 | 11  | 2.9 | 42 | -11.857 |
|     | M6   | 24.4 | 7.62 | 180 | 53 | 173 | 580 | 111 | 48  | 50  | 89  | 585 | 171 | 46  | 6.7 | 86 | -11.746 |
|     | M7   | 25.7 | 7.19 | 110 | 43 | 89  | 323 | 82  | 41  | 40  | 38  | 413 | 234 | 40  | 3.6 | 58 | -11.818 |
|     | P1   | 27.6 | 7.82 | 110 | 66 | 255 | 176 | 91  | 157 | 208 | 95  | 233 | 247 | 8   | 4.0 | 66 | -11.011 |
|     | P2   | 27.5 | 7.14 | 140 | 67 | 423 | 193 | 92  | 168 | 590 | 115 | 195 | 218 | -12 | 4.3 | 94 | -11.786 |
|     | P3   | 26.6 | 7.62 | 70  | 42 | 58  | 118 | 58  | 50  | 51  | 47  | 278 | 129 | -5  | 3.1 | 39 | -11.881 |

|      |      |      |     |    |     |     |     |     |     |     |     |     |     |     |    |         |
|------|------|------|-----|----|-----|-----|-----|-----|-----|-----|-----|-----|-----|-----|----|---------|
| P4   | 24.4 | 7.61 | 80  | 45 | 77  | 127 | 56  | 94  | 49  | 113 | 180 | 302 | -12 | 3.3 | 47 | -13.218 |
| P5   | 24.3 | 7.63 | 40  | 31 | 90  | 73  | 26  | 25  | 60  | 58  | 113 | 116 | 2   | 2.1 | 27 | -13.637 |
| P6   | 24   | 6.96 | 40  | 33 | 74  | 77  | 31  | 26  | 74  | 43  | 150 | 256 | -4  | 2.1 | 33 | -10.381 |
| P7   | 25.8 | 7.86 | 40  | 37 | 90  | 91  | 27  | 36  | 65  | 87  | 105 | 147 | -4  | 1.7 | 32 | -7.252  |
| P8   | 22.9 | 5.4  | 10  | 22 | 165 | 62  | 18  | 12  | 64  | 29  | -   | 345 | -   | 2.0 | -  | -       |
| P9   | 23.9 | 6.95 | 50  | 40 | 84  | 152 | 31  | 103 | 159 | 108 | 53  | 209 | -8  | 1.0 | 43 | -8.298  |
| R1   | 24.9 | 7.26 | 60  | 37 | 140 | 150 | 62  | 26  | 51  | 122 | 150 | 242 | 22  | 3.1 | 44 | -10.629 |
| R2   | 26.8 | 6.89 | 50  | 38 | 99  | 97  | 76  | 19  | 82  | 51  | 98  | 312 | 38  | 1.1 | 35 | -10.593 |
| R3   | 26.8 | 6.82 | 40  | 36 | 109 | 70  | 75  | 21  | -   | 36  | 45  | 139 | -   | 1.5 | -  | -10.639 |
| R4   | 23.4 | 6.89 | 60  | 38 | 51  | 164 | 59  | 24  | 53  | 92  | 188 | 261 | 16  | 3.2 | 42 | -10.639 |
| R5   | 31.4 | 8.95 | 100 | 47 | 106 | 229 | 81  | 63  | -   | 43  | 308 | 379 | -   | 3.8 | -  | -11.469 |
| R6   | 29.8 | 7.5  | 100 | 42 | 182 | 269 | 94  | 45  | 27  | 120 | 353 | 245 | 30  | 5.0 | 62 | -11.170 |
| R7   | 24.9 | 6.89 | 30  | 33 | -   | 71  | 18  | 36  | 92  | 37  | 23  | 345 | -   | 5.7 | -  | -11.449 |
| R8   | 24.4 | 6.38 | 30  | 33 | 170 | 73  | 14  | 43  | 104 | 95  | 8   | 271 | 8   | 1.1 | 34 | -11.459 |
| R9   | 24.6 | 7.1  | 30  | 24 | 87  | 72  | 25  | 13  | 54  | 92  | 60  | 306 | -1  | 1.9 | 31 | -11.347 |
| R10  | 29.6 | 7.94 | 80  | 32 | 37  | 175 | 94  | 31  | 24  | 119 | 330 | 357 | -3  | 3.6 | 55 | -11.132 |
| R11  | 27.7 | 7.45 | 60  | 36 | 39  | 116 | 72  | 25  | 32  | 73  | 210 | 234 | 9   | 3.2 | 38 | -11.227 |
| S1   | 27.9 | 7.87 | 100 | 29 | 146 | 347 | 99  | 40  | 37  | 58  | 458 | 332 | 39  | 4.4 | 67 | -11.877 |
| S2   | 27   | 7.5  | 70  | 29 | 52  | 196 | 72  | 19  | 38  | 43  | 233 | 237 | 39  | 3.0 | 40 | -12.193 |
| S3   | 26.5 | 7.2  | 40  | 27 | 141 | 94  | 56  | 16  | 48  | 114 | 165 | 345 | 3   | 1.3 | 44 | -11.144 |
| TPH1 | 31.2 | 8.78 | 90  | 38 | 86  | 300 | 89  | 46  | 44  | 83  | 233 | 183 | 46  | 3.6 | 49 | -8.431  |
| TPH2 | 29.1 | 8.55 | 90  | 41 | 166 | 288 | 97  | 53  | 49  | 42  | 158 | 379 | 65  | 3.8 | 48 | -10.674 |
| TPH3 | 29.9 | 7.97 | 90  | 44 | 124 | 286 | 92  | 46  | 37  | 23  | 278 | 216 | 56  | 3.6 | 47 | -10.680 |
| MSG1 | 27.8 | 7.07 | 50  | 26 | -   | 81  | 109 | 27  | 97  | 36  | 83  | 339 | -   | 1.7 | -  | -7.335  |
| MSG2 | 28.7 | 7.94 | 30  | 35 | 178 | 74  | 15  | 14  | 47  | 57  | 38  | 182 | 45  | 1.0 | 25 | -10.613 |
| PDG  | 27.6 | 7.2  | 70  | 43 | 325 | 176 | 6   | 10  | 24  | 122 | 368 | 303 | 12  | 3.1 | 61 | -13.686 |

|   |     |      |      |    |    |     |    |    |    |    |     |    |     |    |     |    |         |
|---|-----|------|------|----|----|-----|----|----|----|----|-----|----|-----|----|-----|----|---------|
|   | RSG | 27.6 | 6.86 | 40 | 35 | 174 | 62 | 65 | 32 | 77 | 113 | 68 | 340 | 13 | 1.2 | 40 | -10.611 |
| □ | SSG | 28.9 | 7.42 | 40 | 27 | 74  | 84 | 71 | 29 | 60 | 60  | 60 | 185 | 35 | 1.7 | 27 | -11.603 |

Tw is Temperature of water; M=the Machuan River; P=the Poxi River; R=the Rangxi River; S=the Shuxi River; TPH= the Taiping Lake; MSG, RSG and SSG are the shallow groundwater located in the region of the Machuan, Rangxi and Shuxi rivers, respectively. PDG=deep groundwater located in head of the Poxi River.

$NICB = 100\% \times (TZ^+ - TZ^-) / TZ^+$  where  $TZ^+$  and  $TZ^-$  are cationic and anionic charge in  $\mu\text{eq L}^{-1}$ , respectively.

$TDS = K + Na + Ca + Mg + Cl + SO_4 + NO_3 + HCO_3 + SiO_2$ .
