# Supplementary material for: Quantifying the impacts of non-carbonic acid (NCA) stress on dissolved inorganic carbon (DIC) generation in the granitic-hosted watershed, Huangshan UNESCO Global Geopark, China
Source: Royal Society of Chemistry journal article supplement (doi:10.1039/d2em00071g), 2022-01-01
Supplement: d2em00071g3.pdf [file d2em00071g3.pdf]

Supplementary Table 2 Chemical composition of rain waters over the NMHW

| Rainwater | Sampling<br>time | pH   | K    | Na    | Ca    | Mg   | Cl <sup>-</sup> | NO <sup>-</sup> | SO <sub>2</sub> - |
|-----------|------------------|------|------|-------|-------|------|-----------------|-----------------|-------------------|
|           |                  |      | μM   | μM    | μM    | μM   | μM              | 3               | 4                 |
|           |                  |      |      |       |       |      |                 | μM              | μM                |
| PR1       | 2014.10.23       | 4.93 | 9.10 | -     | 44.83 | 3.54 | 9.15            | -               | -                 |
| PR2       | 2014.11.10       | 6.20 | -    | 17.46 | 27.33 | 1.46 | 8.23            | 19.38           | -                 |
| PR3       | 2014.11.17       | 4.55 | 6.46 | 23.13 | 41.18 | 5.63 | 14.53           | -               | 51.63             |
| PR4       | 2015.8.19        | 6.00 | 3.20 | 9.57  | 26.33 | 1.93 | 11.01           | 25.45           | 12.16             |
| PR5       | 2015.9.29        | 5.50 | 4.41 | 18.34 | 21.06 | 2.62 | 16.39           | 45.78           | 36.63             |
| RR1       | 2014.11.26       | 5.06 | 0.44 | 3.78  | 44.83 | 2.92 | -               | 44.76           | 34.72             |
| RR2       | 2014.12.23       | 5.16 | 4.10 | -     | 36.80 | 0.42 | 9.27            | 65.75           | 53.84             |
| RR3       | 2015.7.25        | 5.57 | 1.95 | 7.38  | 16.59 | 1.41 | 0.91            | 19.62           | 2.63              |
| RR4       | 2015.8.25        | 5.13 | 2.22 | 9.26  | 15.00 | 1.12 | 1.82            | 9.62            | 7.52              |
